# Supplementary material for: Imidazolium based ionic liquid stabilized foams for conformance control: bulk and porous scale investigation
Source: Royal Society of Chemistry journal article supplement (doi:10.1039/d1ra04966f), 2021-01-01
Supplement: d1ra04966f1.pdf [file d1ra04966f1.pdf]

Table S1. Zeta potential measurements of the different systems (rock, brine, ILs).

| Sample | Systems                                                              | $\zeta$ -potential (mV) |        |
|--------|----------------------------------------------------------------------|-------------------------|--------|
|        |                                                                      | 25°C                    | 80°C   |
| 1      | DI+rock                                                              | -0.96                   | -0.64  |
| 2      | DI+rock+500 ppm [C <sub>12</sub> mim] <sup>+</sup> [Cl] <sup>-</sup> | +7.89                   | +7.33  |
| 3      | SW+rock                                                              | +18.8                   | +18.25 |
| 4      | SW+rock+500 ppm [C <sub>12</sub> mim] <sup>+</sup> [Cl] <sup>-</sup> | +58.96                  | +58.55 |
| 5      | SW+rock+500 ppm [C <sub>8</sub> mim] <sup>+</sup> [Cl] <sup>-</sup>  | +55.36                  | +54.33 |
| 6      | SW+rock+500 ppm [C <sub>6</sub> mim] <sup>+</sup> [Cl] <sup>-</sup>  | +53.82                  | +53.13 |
| 7      | SW+rock+500 ppm [C <sub>4</sub> mim] <sup>+</sup> [Cl] <sup>-</sup>  | +51.71                  | +51.25 |

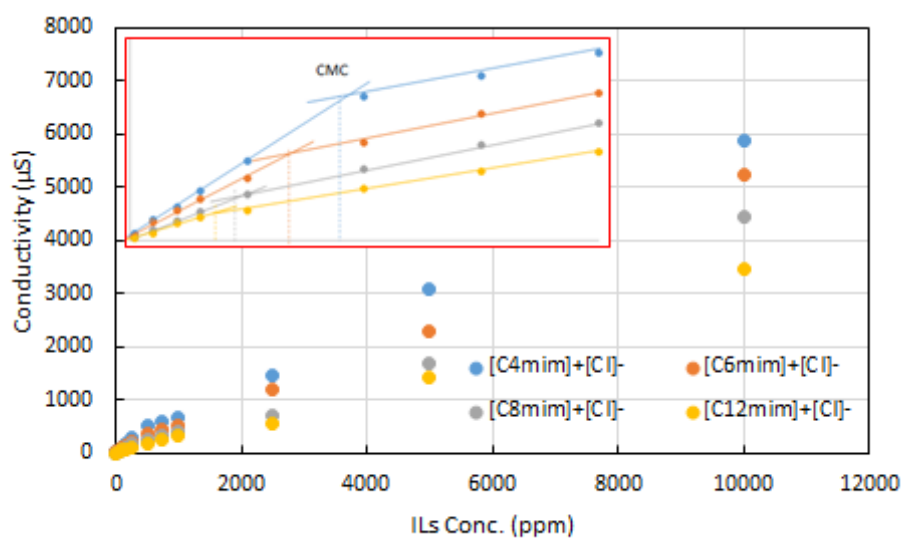

Figure S1. Electrical conductivity of different ILs in deionized water at various concentration in 25°C.
